# Supplementary material
Source: PubMed Central journal article supplement (PMC4731027)
Supplement: NIHMS724590-supplement-supplement_1.pdf [file NIHMS724590-supplement-supplement_1.pdf]

## **SUPPLEMENTARY MATERIAL**

### **Methods**

Representative formalin-fixed paraffin-embedded (FFPE) tissues from 23 individual melanocytic tumors were analyzed. Tumor tissues were isolated by manual microdissection guided by a corresponding H&E slide to obtain at least 50% lesional tissue for DNA extraction. The samples were obtained from 21 pediatric and 2 adult patients for whom follow-up data were available (Table S1).

### ***TERT* Promoter Amplicon Library Construction and Methylation Sequencing**

Genomic DNA was isolated from FFPE tissue sections by using the Maxwell® 16 FFPE Plus LEV DNA Purification Kit (Promega) and converted by using the MethylEdge™ Bisulfite Conversion System (Promega) as per manufacturer's protocol. DNA methylation analysis was performed by bisulfite PCR, using the GoTaq® Long PCR Master Mix (Promega) with primers forward GGGAAGTGTGTAGGGAGGTATTT and reverse AAAACCATAATATAAAAACCCTAAA for 45 cycles at 95°C for 15 s, 53°C for 20 s, and 68°C for 30 s.

DNA libraries were prepared from individual amplicons (50 ng) by using the NextFlex DNA Sequencing kit (Bioo Scientific) and 0.6 μM high-throughput DNA barcodes (Bioo Scientific). Final libraries were checked individually for quality and quantification by quantitative PCR and an Agilent 2200 bioanalyzer. Equimolar concentrations of amplicon libraries were pooled, denatured, and sequenced on an Illumina MiSeq by using 300 cycle reagents (PE150; version 2) and a Nano sequencing kit.

### **Analysis of *TERT* Promoter, *BRAF*, and *NRAS* Mutations**

Genomic DNA was extracted from FFPE tissue sections and screened for hotspot mutations in the *TERT* promoter, *BRAF* (exon 15), and *NRAS* (exons 2 and 3), as previously described (Lu *et al.*, 2015)

### ***TERT* mRNA In Situ Hybridization**

mRNA ISH, a novel method to detect mRNA in FFPE tissues (Wang *et al.*, 2012), was performed for *TERT* mRNA on a Discovery Ultra automation system (Ventana Medical Systems, Inc.) by using RNAscope® VS Reagent Kit – RED (Advanced Cell Diagnostics). VS Probe – Hs-*TERT* (Cat#605516) specific to the sequence spanning nucleotide 2164 to 3231, encoding the *TERT* transcript, was applied according to the manufacturer's instructions. Briefly, 5-µm FFPE tissue sections were pretreated in citrate buffer with heat, followed by protease digestion before hybridization with the target oligo probes. The slides were hybridized sequentially with target probes incubated at 43°C for 2 h and 32 min, preamplifier at 53°C for 32 min, amplifier at 53°C for 32 min, and label probes at room temperature for 12 min. Between the hybridization steps, slides were washed with Ribowash buffer (0.1× saline sodium citrate). Hybridization signals were detected by chromogenic development with Fast Red, followed by counterstaining with hematoxylin. Each sample was quality controlled for RNA integrity with an RNAscope probe for PPIB RNA and for background with a probe for bacterial *dapB* RNA. The specific RNA staining signal was identified as intracellular red punctate dots. mRNA ISH was performed on FFPE sections from 2 melanomas in GCN and 2 proliferative nodules in GCN.

### **Bisulfite-Treated Read Alignment and Methylation Calls**

The ends of reads with a quality score less than 20 were trimmed before adaptor removal. The adaptor matching part of the read was removed if it aligned with the Illumina adapter sequence by at least 1 bp and had a mismatch error rate of 0.1 or less. Reads were aligned to chromosome 5 by using the BSAMP2.74 with a maximum gap size of 3. Only uniquely aligning reads were reported (Xi and Li, 2009). To calculate the methylation ratio for a base position C at a CpG site, the base position needed to have at least a 5x coverage. The number of bisulfite-converted Cs (T, representing unmethylated Cs) and nonconverted Cs (C, representing methylated Cs) were recorded for each C position in a CpG context. The methylation ratio (Beta-value) at each position was calculated as the total number of reads with C divided by the total number of reads with C and T. The methylation status was defined as follows: >0.7, hypermethylated (Figure 1, red); 0.5–0.7, partially methylated (orange); 0.3 to <0.5, partially unmethylated (cyan); and <0.3, unmethylated (blue).

### **RNA Sequence Read Alignment and Gene Expression Calculations**

Paired-end reads from stranded RNA sequence were aligned to the following 4 database files by using BWA (0.5.10) aligner (Li and Durbin, 2010): (1) the human GRCh37-lite reference sequence, (2) RefSeq, (3) a sequence file representing all possible combinations of non-sequential pairs in RefSeq exons, and (4) AceView database flat file downloaded from the UCSC Genome Browser Database, which represented transcripts constructed from human ESTs. The mapping results from (2) to (4) were aligned to human reference genome coordinates. In addition, they were aligned by using STAR 2.3.0 to the human GRCh37-lite reference sequence without annotations. The final BAM file was constructed by selecting the best alignment among

the 5 mappings. HTSeq (Anders *et al.*, 2015) was used to count the number of fragments that mapped to each gene (Gencode v 15), where each gene is considered as the union of all its exons. The count was then normalized to fragments per kilobase of exons per million fragments mapped as the expression value of the gene. Further, the expression value was log<sub>2</sub> transformed.

### **Statistical Analyses**

Statistical analyses were performed using the R statistical package (<http://www.r-project.org/> version 2.15.1). Logistic regression was used to compare the fraction of methylated Cs in the sequenced melanomas in GCN and the remaining samples, with age and gender as covariates. Linear regression was applied to evaluate the association between gene expression and *TERT* promoter methylation. A multivariate logistic regression analysis that considered age, gender, and disease subtype as covariates showed that the methylation ratio for the melanomas arising in GCN ( $n = 3$ ) was significantly higher than that for the other subtypes ( $n = 20$ ), with an estimated Beta-value of 2.6815 ( $P = 2 \times 10^{-16}$ ).

### **Transcription Factors with Potential Binding Sites within the *TERT* Promoter**

To identify which transcription factors have potential binding sites in the amplicon region of the *TERT* promoter, we used the data in TRANSFAC® (<http://www.biobase-international.com>) and the Transcription Factor ChIP-seq from ENCODE. Using the UCSC genome browser, we integrated the data to visualize the binding motifs for the transcription factors with potential binding sites in the region. Among several transcription factors whose binding sites overlaid in the bisulfite amplicon region, 3 were

previously known to repress the transcriptional activity of *TERT*, namely CTCF (Renaud *et al.*, 2007), SIN3A (Xu *et al.*, 2008), and MAZ (Xu *et al.*, 2013) (Figure S1).

## References

- Anders S, Pyl PT, Huber W (2015) HTSeq--a Python framework to work with high-throughput sequencing data. *Bioinformatics* 31:166-9.
- Lee S, Barnhill RL, Dummer R, *et al.* (2015) TERT Promoter Mutations Are Predictive of Aggressive Clinical Behavior in Patients with Spitzoid Melanocytic Neoplasms. *Sci Rep* 5:11200.
- Li H, Durbin R (2010) Fast and accurate long-read alignment with Burrows-Wheeler transform. *Bioinformatics* 26:589-95.
- Lu C, Zhang J, Nagahawatte P, *et al.* (2015) The genomic landscape of childhood and adolescent melanoma. *J Invest Dermatol* 135:816-23.
- Renaud S, Loukinov D, Abdullaev Z, *et al.* (2007) Dual role of DNA methylation inside and outside of CTCF-binding regions in the transcriptional regulation of the telomerase hTERT gene. *Nucleic Acids Res* 35:1245-56.
- Wang F, Flanagan J, Su N, *et al.* (2012) RNAscope: a novel in situ RNA analysis platform for formalin-fixed, paraffin-embedded tissues. *J Mol Diagn* 14:22-9.
- Xi Y, Li W (2009) BSMAP: whole genome bisulfite sequence MAPPING program. *BMC Bioinformatics* 10:232.
- Xu M, Katzenellenbogen RA, Grandori C, *et al.* (2013) An unbiased in vivo screen reveals multiple transcription factors that control HPV E6-regulated hTERT in keratinocytes. *Virology* 446:17-24.
- Xu M, Luo W, Elzi DJ, *et al.* (2008) NFX1 interacts with mSin3A/histone deacetylase to repress hTERT transcription in keratinocytes. *Mol Cell Biol* 28:4819-28.

## Supplementary Figures

## Figure S1

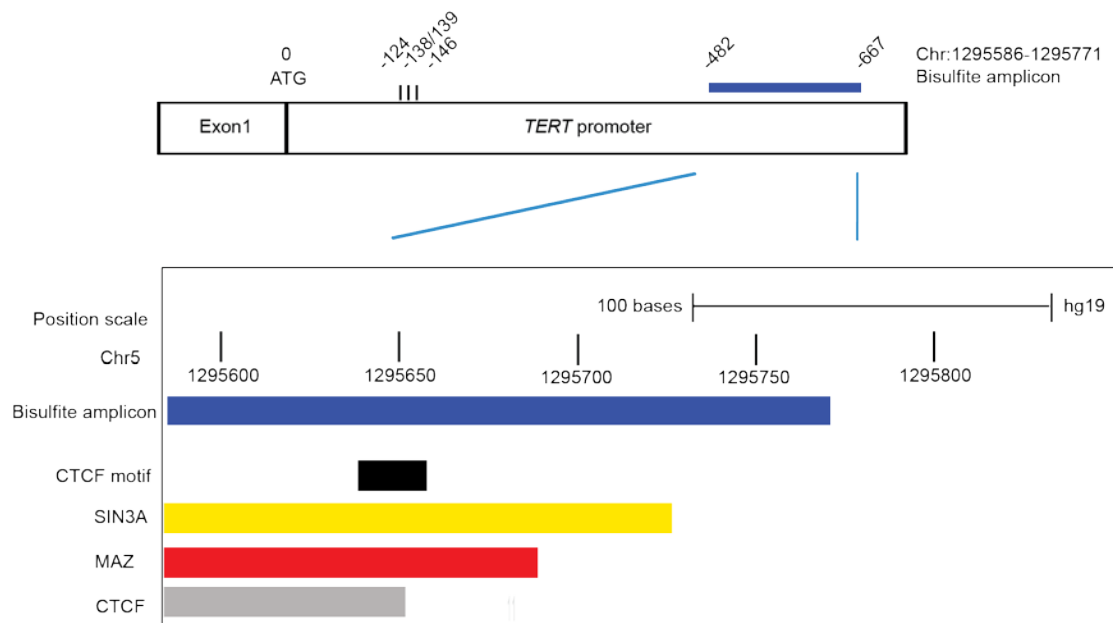

Figure S1—Schema of the *TERT* promoter and the putative transcriptional repressor binding sites. The *TERT* promoter (top panel) and the potential binding sites for transcription repressors (bottom panel). The top panel from left to right shows the position of hotspot mutations C228T at  $-124$ , CC242/243TT at  $-138/-139$ , and C250T at  $-146$  from the ATG start site, and the position of the bisulfite amplicon sequence (blue bar). The amplicon sequence encompasses 26 CpG ([chr5:1295586–1295771 (GRCh37/hg19)] from nucleotide positions  $-482$  to  $-667$ , according to the ATG start site. Potential transcription binding sites in the bisulfite amplicon were analyzed by using TRANSFAC® and the Transcription Factor Chip-seq data from ENCODE. The binding sites for 3 transcriptional repressors SIN3A, MAZ and CTCF overlay within the bisulfite amplicon region. By using the UCSC genome browser, the position of the CTCF motif (black bar) was visualized.

Figure S2

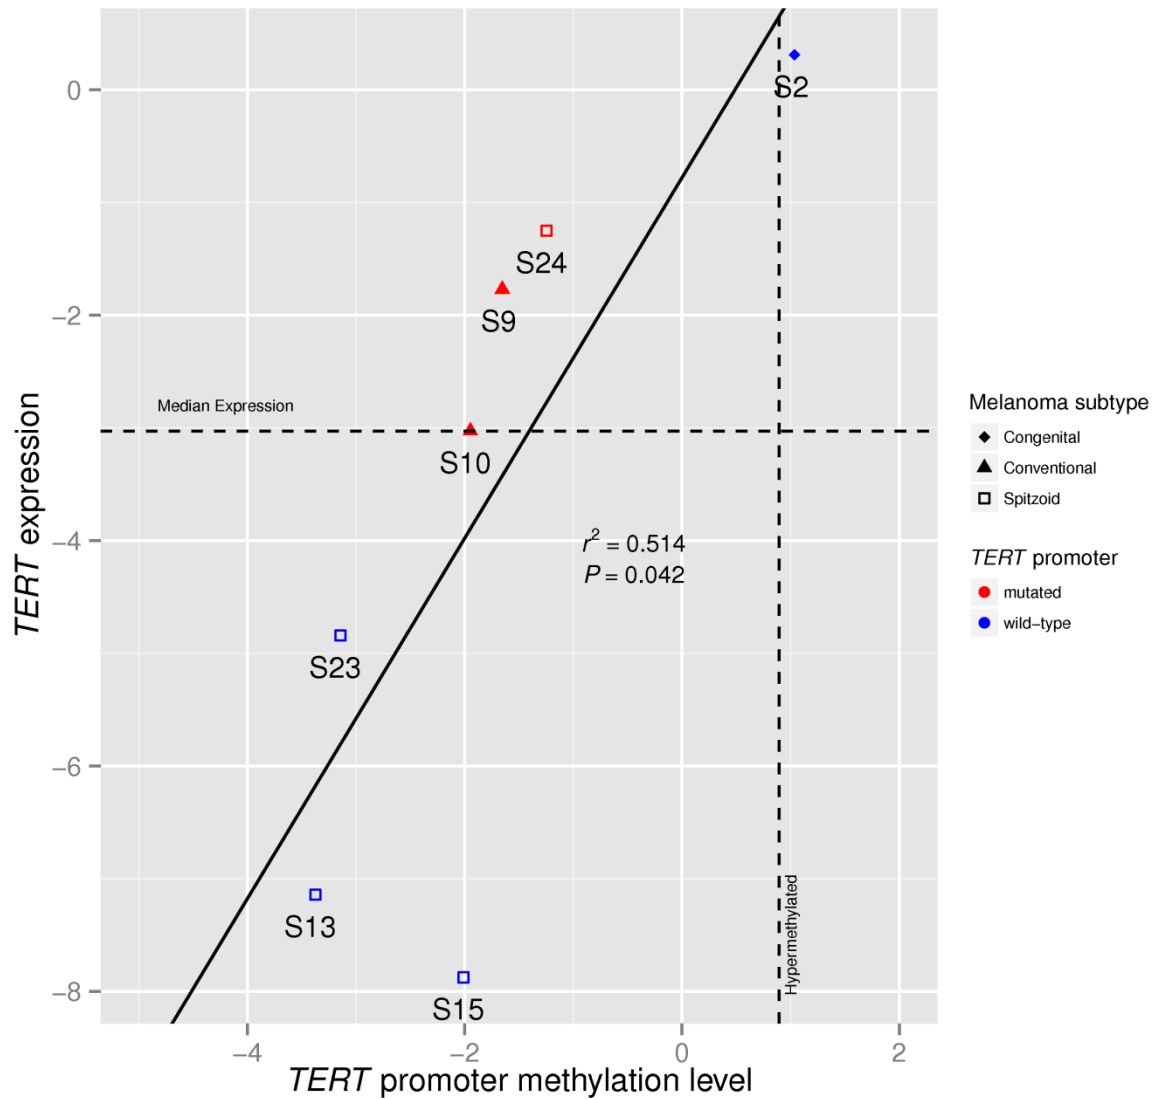

Figure S2– Association between *TERT* expression on the RNA sequence read and the *TERT* promoter methylation level. A strong positive correlation was observed between *TERT* expression and *TERT* promoter methylation level (adjusted  $r^2 = 0.5145$ ,  $P = 0.042$ ). S, sample identification number.



## Supplementary Tables

**Table S1**– Demographic data for the 23 patients with melanocytic neoplasms.

| Sample no. | Age   | Sex | Primary site    | Sample site     | Outcome | F/U time (months) |
|------------|-------|-----|-----------------|-----------------|---------|-------------------|
| S1         | 5 y   | M   | trunk           | Primary         | DOD     | 14                |
| S2         | 3 y   | M   | scalp           | Primary         | DOD     | 8                 |
| S4         | 19 y  | F   | face            | metastatic      | DOD     | 36                |
| S5         | 16 y  | M   | face            | metastatic      | DOD     | 45                |
| S6         | 15 y  | F   | trunk           | metastatic (LN) | AWD     | 61                |
| S7         | 17 y  | F   | trunk           | metastatic (LN) | AWD     | 31                |
| S8         | 14 mo | F   | trunk           | Primary         | NED     | 62                |
| S9         | 16 y  | M   | scalp           | metastatic      | DOD     | 70                |
| S10        | 14 y  | F   | unknown         | metastatic      | DOD     | 21                |
| S11        | 1 mo  | F   | trunk           | Primary         | NED     | 372               |
| S13        | 2 y   | M   | lower extremity | Primary         | NED     | 8                 |
| S14        | 9 y   | M   | ear             | Primary         | NED     | 11                |
| S15        | 4 y   | F   | trunk           | Primary         | NED     | 40                |
| S16        | 2 y   | M   | lower extremity | Primary         | NED     | 72                |
| S18        | 48 y  | F   | scalp           | metastatic (LN) | DOD     | 25                |
| S19        | 11 y  | F   | lower extremity | metastatic (LN) | DOD     | 24                |
| S20        | 4 y   | F   | lower extremity | Primary         | NED     | 13                |
| S21        | 7 y   | M   | trunk           | Primary         | DOD     | 25                |
| S22        | 38 y  | F   | upper extremity | metastatic (LN) | DOD     | 36                |
| S23        | 13 y  | F   | lower extremity | Primary         | NED     | 17                |
| S24        | 14 y  | M   | trunk           | metastatic      | DOD     | 18                |
| S26        | 5 y   | F   | trunk           | Primary         | NED     | 6                 |
| S27        | 15 y  | F   | trunk           | Primary         | NED     | 36                |

**Abbreviations:** DOD, dead of disease; NED, no evidence of disease; AWD, alive with disease; LN, lymph node; y, years old; mo, months old

**Table S2**– Methylation ratios (Beta-value) in the range of 0 to 1 at each CpG site for the 23 melanocytic tumors.

| chr | C position in CpG context (CpG site) | S1    | S2    | S4    | S5    | S6    | S7    | S8    | S9    | S10   | S11   |
|-----|--------------------------------------|-------|-------|-------|-------|-------|-------|-------|-------|-------|-------|
| 5   | 1295586                              | 1     | 0.76  | 0     | 0     | 0     | 0.061 | 0     | 0.043 | 0.556 | 0     |
| 5   | 1295590                              | 1     | 0.68  | 0     | NA    | 0.242 | 0     | 0     | NA    | 0     | NA    |
| 5   | 1295593                              | 0.042 | 0.48  | 0     | 0     | 0     | 0.061 | 0     | 0.12  | 0     | 0     |
| 5   | 1295605                              | 1     | 0.692 | 0.286 | 0     | 0     | 0.086 | 0     | 0.074 | 0     | 0     |
| 5   | 1295618                              | NA    | 0.714 | NA    | NA    | NA    | 0.216 | NA    | 0.071 | NA    | NA    |
| 5   | 1295644                              | 1     | 0.515 | 0.273 | 0.271 | 0.258 | 0.278 | 0     | 0.163 | 0.154 | 0     |
| 5   | 1295648                              | 1     | 0.694 | 0     | 0.266 | 0.231 | 0.158 | 0     | 0.167 | 0.233 | 0.034 |
| 5   | 1295650                              | 1     | 0.692 | 0     | 0.284 | 0.284 | 0.288 | 0.023 | 0.319 | 0.424 | 0     |
| 5   | 1295655                              | 1     | 0.722 | 0     | 0     | 0.108 | 0.353 | 0     | 0.107 | 0.353 | 0     |
| 5   | 1295658                              | 1     | 0.722 | 0     | 0     | 0.054 | 0.088 | 0     | NA    | 0.059 | 0     |
| 5   | 1295665                              | 1     | 0.722 | 0     | NA    | 0.316 | 0.182 | 0     | 0.107 | 0.059 | 0     |
| 5   | 1295674                              | 1     | 0.737 | 0     | 0.353 | 0.243 | 0.323 | 0     | 0.25  | 0.235 | 0     |
| 5   | 1295681                              | 1     | 0.737 | 0     | 0.406 | 0.378 | 0.387 | 0     | 0.214 | 0.111 | 0     |
| 5   | 1295685                              | 1     | 0.722 | 0     | 0     | 0.25  | 0.233 | 0.1   | 0.074 | NA    | 0     |
| 5   | 1295699                              | 1     | 0.647 | 0     | 0.312 | 0.472 | 0.467 | 0.15  | 0.222 | 0.353 | 0     |
| 5   | 1295705                              | 1     | 0.706 | 0     | 0.533 | 0.343 | 0.379 | 0.053 | 0.269 | 0.353 | 0     |
| 5   | 1295707                              | 1     | 0.765 | 0.167 | 0.333 | 0.6   | 0.429 | 0.105 | 0.346 | 0.412 | 0     |
| 5   | 1295713                              | 1     | 0.647 | NA    | 0.533 | 0.306 | 0.148 | 0.053 | 0.333 | 0.059 | 0     |
| 5   | 1295715                              | 1     | 0.706 | 0     | 0.333 | 0.057 | 0.556 | 0.053 | 0.538 | 0.412 | 0.091 |
| 5   | 1295725                              | 1     | 0.647 | 0     | 0     | 0.371 | 0.296 | 0     | 0.37  | 0.118 | 0.273 |
| 5   | 1295731                              | 1     | 0.562 | 0     | 0     | 0.171 | 0.192 | 0     | 0.222 | 0     | 0     |
| 5   | 1295737                              | 1     | 0.625 | 0     | 0.357 | 0.343 | 0.385 | 0     | 0.385 | 0.267 | 0     |
| 5   | 1295753                              | 1     | 0.688 | 0     | 0.28  | 0.355 | 0.48  | 0.053 | 0.4   | 0.333 | 0     |
| 5   | 1295759                              | 1     | 0.625 | 0     | 0.32  | 0.172 | 0.083 | 0.053 | 0.292 | 0     | 0     |
| 5   | 1295761                              | 1     | 0.625 | 0     | 0.261 | 0.552 | 0.417 | 0.053 | 0.5   | 0.154 | 1     |
| 5   | 1295771                              | 1     | 0.714 | 0.188 | 0.263 | 0.56  | 0.5   | 0.118 | 0.316 | 0.083 | 0     |

Table S2– Cont'd

| CpG site | S13   | S14   | S15   | S16   | S18   | S19 | S20   | S21   | S22   | S23   | S24   | S26   | S27   |
|----------|-------|-------|-------|-------|-------|-----|-------|-------|-------|-------|-------|-------|-------|
| 1295586  | 0     | 0.029 | 0.02  | 0.095 | 0.433 | 0   | NA    | 0.824 | 0.722 | 0     | 0.13  | 0     | 0.053 |
| 1295590  | NA    | 0.108 | NA    | 0     | 0.469 | 0   | 0.105 | 0.765 | 0.722 | 0.045 | 0.087 | 0     | 0.05  |
| 1295593  | 0.024 | 0.051 | 0.038 | 0.048 | 0.471 | 0   | 0.143 | 0.824 | 0.611 | 0     | 0.261 | 0     | 0.05  |
| 1295605  | 0     | 0.062 | 0.018 | 0     | 0.417 | 0   | 0.087 | 0.824 | 0.722 | 0     | 0.16  | 0     | 0.05  |
| 1295618  | NA    | NA    | NA    | NA    | NA    | NA  | NA    | NA    | NA    | NA    | 0.148 | NA    | 0.048 |
| 1295644  | 0.38  | 0.1   | 0.118 | 0.2   | 0.491 | 0   | 0.167 | 0.773 | 0.68  | NA    | 0.258 | 0     | 0.125 |
| 1295648  | 0.04  | 0.036 | 0.09  | 0.086 | 0.475 | 0   | 0.139 | 0.741 | 0.581 | 0     | 0.235 | 0     | 0.172 |
| 1295650  | 0.027 | 0.093 | 0.3   | 0.081 | 0.474 | 0   | 0.079 | 0.759 | 0.677 | 0     | 0.306 | 0     | 0.323 |
| 1295655  | 0     | NA    | 0.169 | 0.333 | 0.419 | 0   | 0     | 0.769 | 0.312 | 0.125 | 0.235 | 0     | 0.267 |
| 1295658  | 0.029 | 0.095 | 0.133 | 0     | 0.323 | 0   | 0     | 0.769 | 0.438 | 0.062 | 0.235 | 0.125 | 0.267 |
| 1295665  | 0.088 | 0.214 | 0.246 | 0.062 | 0.438 | 0   | 0.067 | 0.615 | 0.625 | 0.133 | 0.235 | 0.067 | 0     |
| 1295674  | 0.111 | 0.238 | 0.115 | 0     | 0.412 | 0   | 0     | 0.769 | 0.588 | 0.214 | 0.353 | 0     | 0.067 |
| 1295681  | 0.056 | 0.3   | 0.222 | 0     | 0.441 | 0   | 0.059 | 0.786 | 0.529 | 0.143 | 0.353 | 0     | 0.333 |
| 1295685  | 0.028 | 0.125 | 0.169 | NA    | NA    | 0   | 0     | 0.786 | 0.529 | 0     | 0.235 | 0     | 0     |
| 1295699  | 0.083 | 0.317 | 0.345 | 0.312 | 0.548 | NA  | 0.056 | 0.786 | 0.733 | 0.143 | 0.471 | 0     | 0     |
| 1295705  | 0.029 | 0.3   | 0.283 | 0.438 | 0.5   | 0   | 0.056 | 0.643 | 0.6   | 0.357 | 0.529 | 0.125 | 0.2   |
| 1295707  | NA    | 0.375 | 0.396 | 0.125 | 0.531 | 0   | NA    | 0.786 | 0.8   | 0.5   | 0.471 | 0.125 | 0.2   |
| 1295713  | 0.086 | 0.19  | 0.321 | 0.294 | 0.471 | 0   | 0.056 | 0.643 | 0.6   | 0     | 0.444 | 0.125 | 0.062 |
| 1295715  | 0.088 | NA    | NA    | 0.438 | NA    | 0   | 0.412 | 0.786 | 0.467 | 0.429 | NA    | 0.062 | NA    |
| 1295725  | 0.083 | 0.167 | 0.154 | 0.294 | 0.353 | 0   | 0.056 | 0.786 | 0.75  | 0     | 0.312 | NA    | 0.062 |
| 1295731  | 0.143 | 0.025 | 0.113 | 0     | 0.324 | 0   | 0     | 0.786 | NA    | 0.077 | 0.125 | 0     | 0.067 |
| 1295737  | 0.029 | 0.368 | 0.28  | 0.167 | 0.485 | 0   | 0.118 | 0.786 | 0.438 | 0.083 | 0.375 | 0     | 0.2   |
| 1295753  | 0.406 | 0.188 | 0.4   | 0.118 | 0.562 | 0   | 0     | 0.714 | 0.733 | 0.083 | 0.6   | 0.312 | 0.308 |
| 1295759  | 0.031 | 0.103 | 0.163 | 0     | 0.406 | 1   | 0.067 | 0.786 | 0.467 | 0.25  | 0.267 | 0.067 | 0.071 |
| 1295761  | 0.062 | 0.241 | 0.317 | 0.529 | 0.667 | 0   | 0.133 | 0.786 | 0.733 | 0.417 | 0.467 | 0.067 | 0.143 |
| 1295771  | NA    | 0.364 | 0.371 | 0.214 | 0.68  | 0   | 0.2   | 0.846 | 0.667 | 0     | 0.615 | 0     | 0     |

Abbreviations: Chr, chromosome; NA, not available.

**Table S3**– The total number of methylated Cs and unmethylated Cs in the sequenced region for each sample.

| Sample no | M   | UM   | Gender | Age    | Disease         |
|-----------|-----|------|--------|--------|-----------------|
| S1        | 528 | 23   | M      | 2to10  | Melanoma in GCN |
| S2        | 365 | 178  | M      | 2to10  | Melanoma in GCN |
| S21       | 301 | 92   | M      | 2to10  | Melanoma in GCN |
| S4        | 23  | 484  | F      | 10to20 | Other           |
| S5        | 175 | 617  | M      | 10to20 | Other           |
| S6        | 248 | 701  | F      | 10to20 | Other           |
| S7        | 220 | 629  | F      | 10to20 | Other           |
| S8        | 16  | 567  | F      | <2     | Other           |
| S9        | 165 | 519  | M      | 10to20 | Other           |
| S10       | 89  | 343  | F      | 10to20 | Other           |
| S11       | 16  | 330  | F      | <2     | Other           |
| S13       | 79  | 819  | M      | 2to10  | Other           |
| S14       | 163 | 847  | M      | 2to10  | Other           |
| S15       | 259 | 1044 | F      | 2to10  | Other           |
| S16       | 69  | 395  | M      | 2to10  | Other           |
| S18       | 381 | 435  | F      | >20    | Other           |
| S19       | 11  | 329  | F      | 10to20 | Other           |
| S20       | 41  | 405  | F      | 2to10  | Other           |
| S22       | 262 | 163  | F      | >20    | Other           |
| S23       | 42  | 371  | F      | 10to20 | Other           |
| S24       | 148 | 351  | M      | 10to20 | Other           |
| S26       | 17  | 414  | F      | 2to10  | Other           |
| S27       | 56  | 381  | F      | 10to20 | Other           |

Abbreviations: M, number of methylated Cs in the region (26 CpGs); UM, number of unmethylated Cs in the region (26 CpGs); GCN, giant congenital nevus
